# Supplementary material
Source: MDPI journal article supplement (https://www.mdpi.com/2227-9717/11/4/1027)
Supplement: s1 [file s1]

Article

# Development of a Zeolite H-ZSM-5-Based D- $\mu$ SPE Method for the Determination of Organophosphorus Pesticides in Tea Beverages

Bing Bai <sup>1,†</sup>, Nan Wu <sup>1,†</sup>, Haifeng Yang <sup>1,2</sup>, Haiyan Liu <sup>1,2</sup>, Xiaofen Jin <sup>1,2</sup>, Lei Chen <sup>1,2</sup>, Zhiying Huang <sup>1,2</sup>, Changyan Zhou <sup>1</sup>, Shouying Wang <sup>1,2,\*</sup> and Wenshuai Si <sup>1,2,3,\*</sup>

## 1 Supplementary Figures and Tables

### 1.1 Supplementary Figures

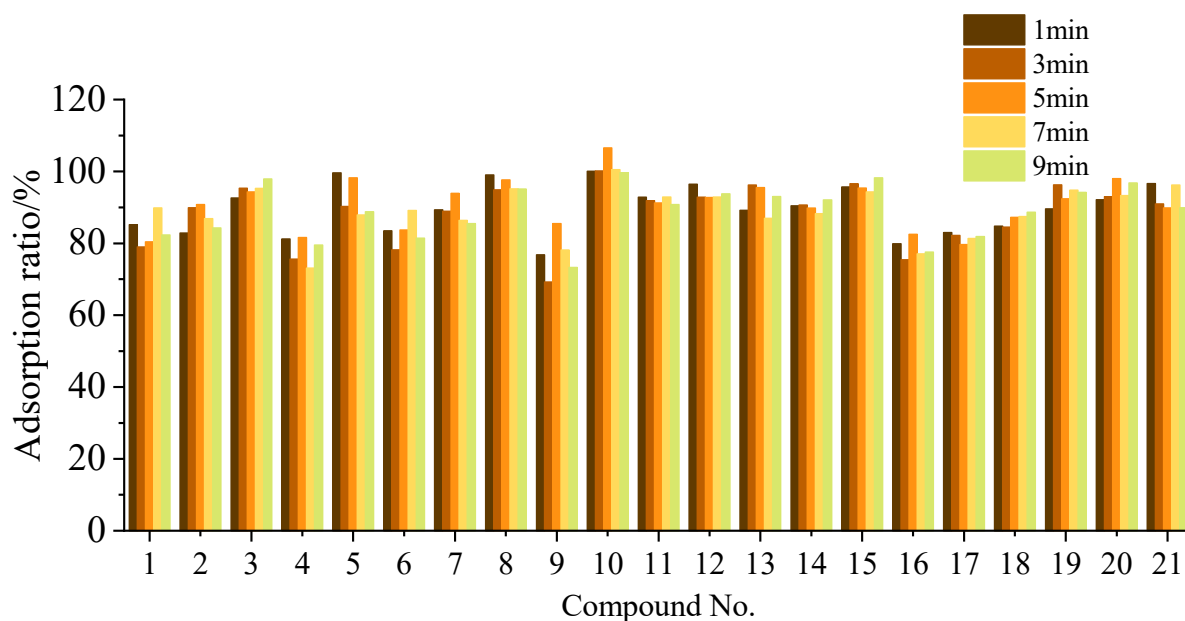

**Figure S1.** The percentage of adsorption for time evolution

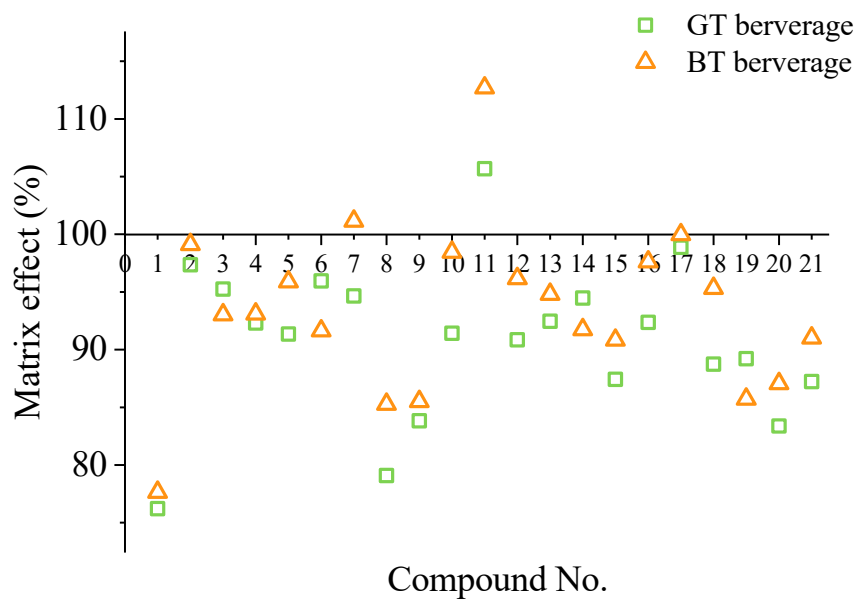

**Figure S2.** The matrix effects of 21 pesticides in black tea (BT) and green tea (GT) beverages

## 1.2 Supplementary Tables

**Table S1** Chemical information and Multiple Reaction Monitoring parameters for 21 pesticides

| No. | Compound name | CAS number | Formula                                                         | Q1<br>m/z | Q3<br>m/z | DP<br>Voltage<br>(V) | CE (V) | Log K <sub>ow</sub> | PMV/cm <sup>3</sup> |
|-----|---------------|------------|-----------------------------------------------------------------|-----------|-----------|----------------------|--------|---------------------|---------------------|
| 1   | bupirimate    | 41483-43-6 | C <sub>13</sub> H <sub>24</sub> N <sub>4</sub> O <sub>3</sub> S | 317       | 166       | 90                   | 31     | 2.7                 | 262.7±3.0           |
|     |               |            |                                                                 | 317       | 210       | 90                   | 33     |                     |                     |
| 2   | butachlor     | 23184-66-9 | C <sub>17</sub> H <sub>26</sub> ClNO <sub>2</sub>               | 312.1     | 238       | 20                   | 15     | 4.5                 | 290.5±3.0           |
|     |               |            |                                                                 | 312.1     | 162       | 20                   | 32     |                     |                     |
| 3   | cadusafos     | 95465-99-9 | C <sub>10</sub> H <sub>23</sub> O <sub>2</sub> PS <sub>2</sub>  | 271       | 159       | 40                   | 19     | 3.3                 | 252.8±3.0           |
|     |               |            |                                                                 | 271       | 131       | 40                   | 31     |                     |                     |
| 4   | coumaphos     | 56-72-4    | C <sub>14</sub> H <sub>16</sub> ClO <sub>5</sub> PS             | 363       | 227       | 100                  | 35     | 4.5                 | 261.8±5.0           |
|     |               |            |                                                                 | 363       | 307       | 100                  | 23     |                     |                     |

|    |                            |             |               |       |       |    |    |      |           |
|----|----------------------------|-------------|---------------|-------|-------|----|----|------|-----------|
| 5  | demeton                    | 8065-48-3   | C16H38O6P2S4  | 259   | 89    | 48 | 22 | 3.21 | 225.4±3.0 |
|    |                            |             |               | 259   | 61    | 48 | 45 |      |           |
| 6  | disulfoton                 | 298-04-4    | C8H19O2PS3    | 275.1 | 89    | 20 | 17 | 4    | 233.3±3.0 |
|    |                            |             |               | 275.1 | 61    | 20 | 46 |      |           |
| 7  | disulfoton sulfone         | 2497-6-5    | C8H19O3PS3    | 291   | 185   | 70 | 15 | 1.9  | 240.3±3.0 |
|    |                            |             |               | 291   | 213   | 70 | 22 |      |           |
| 8  | disulfoton sulfoxide       | 2497-7-6    | C8H19O2PS2    | 275.1 | 89    | 60 | 17 | 1.7  | 228.8±3.0 |
|    |                            |             |               | 275.1 | 61    | 60 | 12 |      |           |
| 9  | ethoprophos                | 13194-48-4  | C11H17O4PS2   | 243   | 97    | 67 | 43 | 3.6  | 219.0±3.0 |
|    |                            |             |               | 243   | 131   | 67 | 26 |      |           |
| 10 | fensulfothion              | 115-90-2    | C11H17O6PS    | 309.1 | 253   | 85 | 23 | 2.2  | 235.0±5.0 |
|    |                            |             |               | 309.1 | 175   | 85 | 33 |      |           |
| 11 | fensulfothion oxon sulfone | 6132-17-8   | C11H17O6PS    | 325   | 269   | 90 | 21 | 1.5  | 241.6±3.0 |
|    |                            |             |               | 325   | 297   | 90 | 15 |      |           |
| 12 | fensulfothion sulfone      | 14255-72-2  | C11H17O5PS2   | 309   | 281   | 80 | 18 | 2.6  | 249.5±3.0 |
|    |                            |             |               | 309   | 253   | 80 | 25 |      |           |
| 13 | fluopyram                  | 658066-35-4 | C16H11ClF6N2O | 397   | 207.9 | 60 | 30 | 4.5  | 279.2±3.0 |
|    |                            |             |               | 397   | 172.9 | 60 | 40 |      |           |
| 14 | myclobutanil               | 88671-89-0  | C15H17ClN4    | 289   | 70    | 80 | 35 | 2.9  | 247.9±7.0 |
|    |                            |             |               | 289   | 125   | 80 | 46 |      |           |
| 15 | phorate sulfoxide          | 2588-5-8    | C7H17O4PS2    | 277   | 199   | 25 | 13 | 3.5  | 204.4±3.0 |
|    |                            |             |               | 277   | 153   | 25 | 19 |      |           |
| 16 | prochloraz                 | 67747-09-5  | C15H16Cl3N3O2 | 376.2 | 308   | 20 | 15 | 4.6  | 274.2±7.0 |

|    |                    |             |                |       |       |    |    |     |           |
|----|--------------------|-------------|----------------|-------|-------|----|----|-----|-----------|
|    |                    |             |                | 376.2 | 266   | 20 | 22 |     |           |
| 17 | profenofos         | 41198-08-7  | C11H15BrClO3PS | 373   | 302.9 | 80 | 25 | 4.7 | 252.1±3.0 |
|    |                    |             |                | 373   | 345.2 | 80 | 18 |     |           |
| 18 | propiconazole      | 60207-90-1  | C15H17Cl2N3O2  | 342.1 | 159   | 70 | 43 | 3.5 | 244.9±7.0 |
|    |                    |             |                | 344.1 | 161   | 70 | 43 |     |           |
| 19 | pyridaphenthion    | 119-12-0    | C14H17N2O4PS   | 341   | 189   | 94 | 30 | 3.3 | 260.6±7.0 |
|    |                    |             |                | 341   | 205   | 94 | 30 |     |           |
| 20 | terbufos sulfoxide | 10548-10-4  | C9H21O3PS3     | 305   | 187   | 57 | 20 | 2.2 | 245.4±3.0 |
|    |                    |             |                | 305   | 131   | 57 | 38 |     |           |
| 21 | tetraconazole      | 112281-77-3 | C13H11Cl2F4N3O | 372   | 159   | 98 | 40 | 4.4 | 247.2±7.0 |
|    |                    |             |                | 372   | 70    | 98 | 50 |     |           |

**Table S2** The linearity and calibration curves of twenty-one pesticides

| Compound name        | Calibration curves            | Linearity(ng/mL) | R <sup>2</sup> |
|----------------------|-------------------------------|------------------|----------------|
| bupirimate           | y = 1.76740e8 x + 5116.24031  | 0.2-50           | 0.99969        |
| butachlor            | y = 9.98264e7 x + 688.07208   | 0.2-50           | 0.99886        |
| cadusafos            | y = 5.88125e8 x + 1.21945e5   | 0.2-50           | 0.98691        |
| coumaphos            | y = 1.45802e8 x + 3547.05691  | 0.2-50           | 0.99975        |
| demeton              | y = 1.30732e7 x + 348.36930   | 0.2-50           | 0.99819        |
| disulfoton           | y = 6.42813e7 x + 4054.57404  | 0.2-50           | 0.99783        |
| disulfoton sulfone   | y = 1.09659e8 x + 10803.06446 | 0.2-50           | 0.99733        |
| disulfoton sulfoxide | y = 2.75946e8 x + 24330.15218 | 0.2-50           | 0.99844        |

|                               |                                 |        |         |
|-------------------------------|---------------------------------|--------|---------|
| ethoprophos                   | $y = 1.26336e8 x + 4309.57993$  | 0.2-50 | 0.99917 |
| fensulfothion                 | $y = 1.64836e8 x + 5670.31266$  | 0.2-50 | 0.99945 |
| fensulfothion oxon<br>sulfone | $y = 1.52374e8 x + 5387.59941$  | 0.2-50 | 0.99965 |
| fensulfothion<br>sulfone      | $y = 1.20170e8 x + 5197.57029$  | 0.2-50 | 0.99962 |
| fluopyram                     | $y = 2.51263e8 x + 2566.31757$  | 0.2-50 | 0.99738 |
| myclobutanil                  | $y = 3.46090e7 x + 2033.02901$  | 0.2-50 | 0.9994  |
| phorate sulfoxide             | $y = 3.72061e8 x + 3.38838e4$   | 0.2-50 | 0.99766 |
| prochloraz                    | $y = 2.38377e8 x + 3332.60858$  | 0.2-50 | 0.99968 |
| profenofos                    | $y = 1.00781e8 x + 15025.68219$ | 0.2-50 | 0.99305 |
| propiconazole                 | $y = 6.30089e7 x + 3215.60019$  | 0.2-50 | 0.99969 |
| pyridaphenthion               | $y = 2.32578e8 x + 4192.60307$  | 0.2-50 | 0.99933 |
| terbufos sulfoxide            | $y = 2.78442e8 x + 25852.26451$ | 0.2-50 | 0.99784 |
| tetraconazole                 | $y = 5.09799e7 x + 2177.35288$  | 0.2-50 | 0.99956 |
